# Supplementary material
Source: PubMed Central journal article supplement (PMC4349931)
Supplement: 97320630011001S1.pdf [file 97320630011001S1.pdf]

## Supplementary material:

**Table 1:** No. of bacterial cultures isolated from soil samples

| Sample no    | Type of cultures isolated | Name of isolated cultures                |
|--------------|---------------------------|------------------------------------------|
| A (0.5% dye) | 4                         | AMA1, AMA2, AMA3, AMA4                   |
| B (1% dye)   | 7                         | AMB1, AMB2, AMB3, AMB4, AMB5, AMB6, AMB7 |
| C (2% dye)   | 4                         | AMC1, AMC2, AMC3, AMC4                   |
